# Supplementary material for: Effects of Allium mongolicum Regel and Its Flavonoids on Constipation
Source: MDPI journal article supplement (doi:10.3390/biom10010014), 2019-12-20

1 **Supplementary Materials:** The following are available online at [www.mdpi.com/xxx/s1](http://www.mdpi.com/xxx/s1),

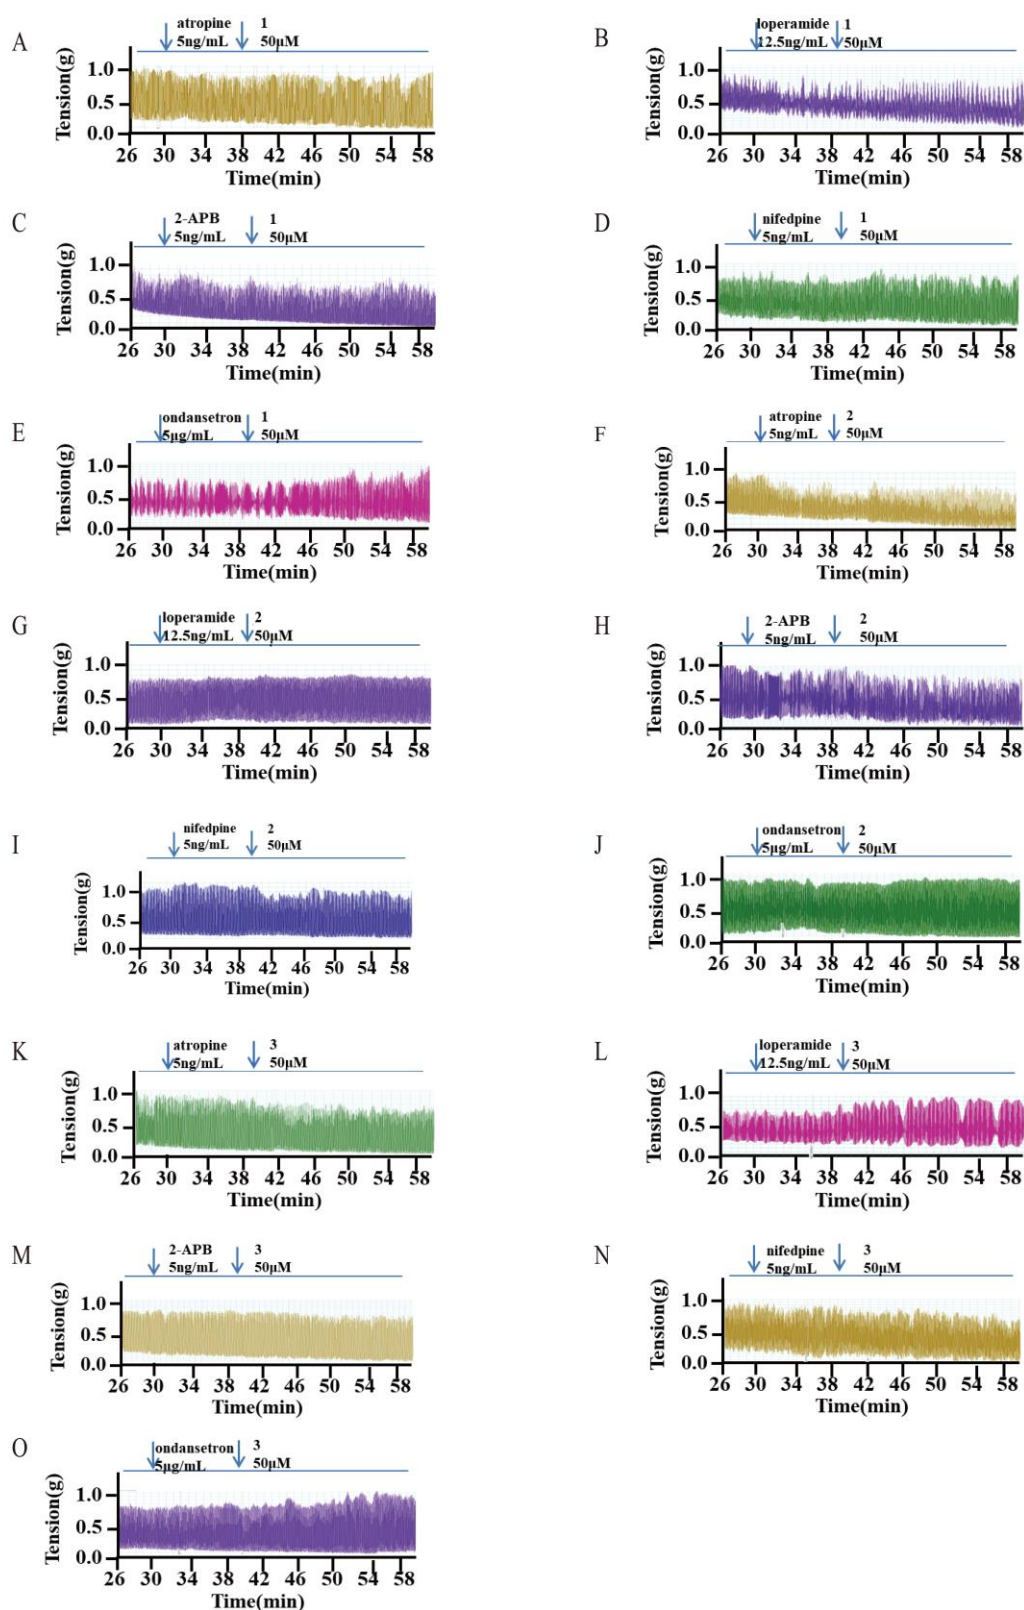

2 **Figure S1:** Intestinal contraction under AM flavonoids-treated with inhibitors. (A–O) Effects of 1 (A–E), 2  
3 (F–J) and 3 (K–O) on spontaneous contractions of isolated intestinal contraction with different inhibitors.  
4

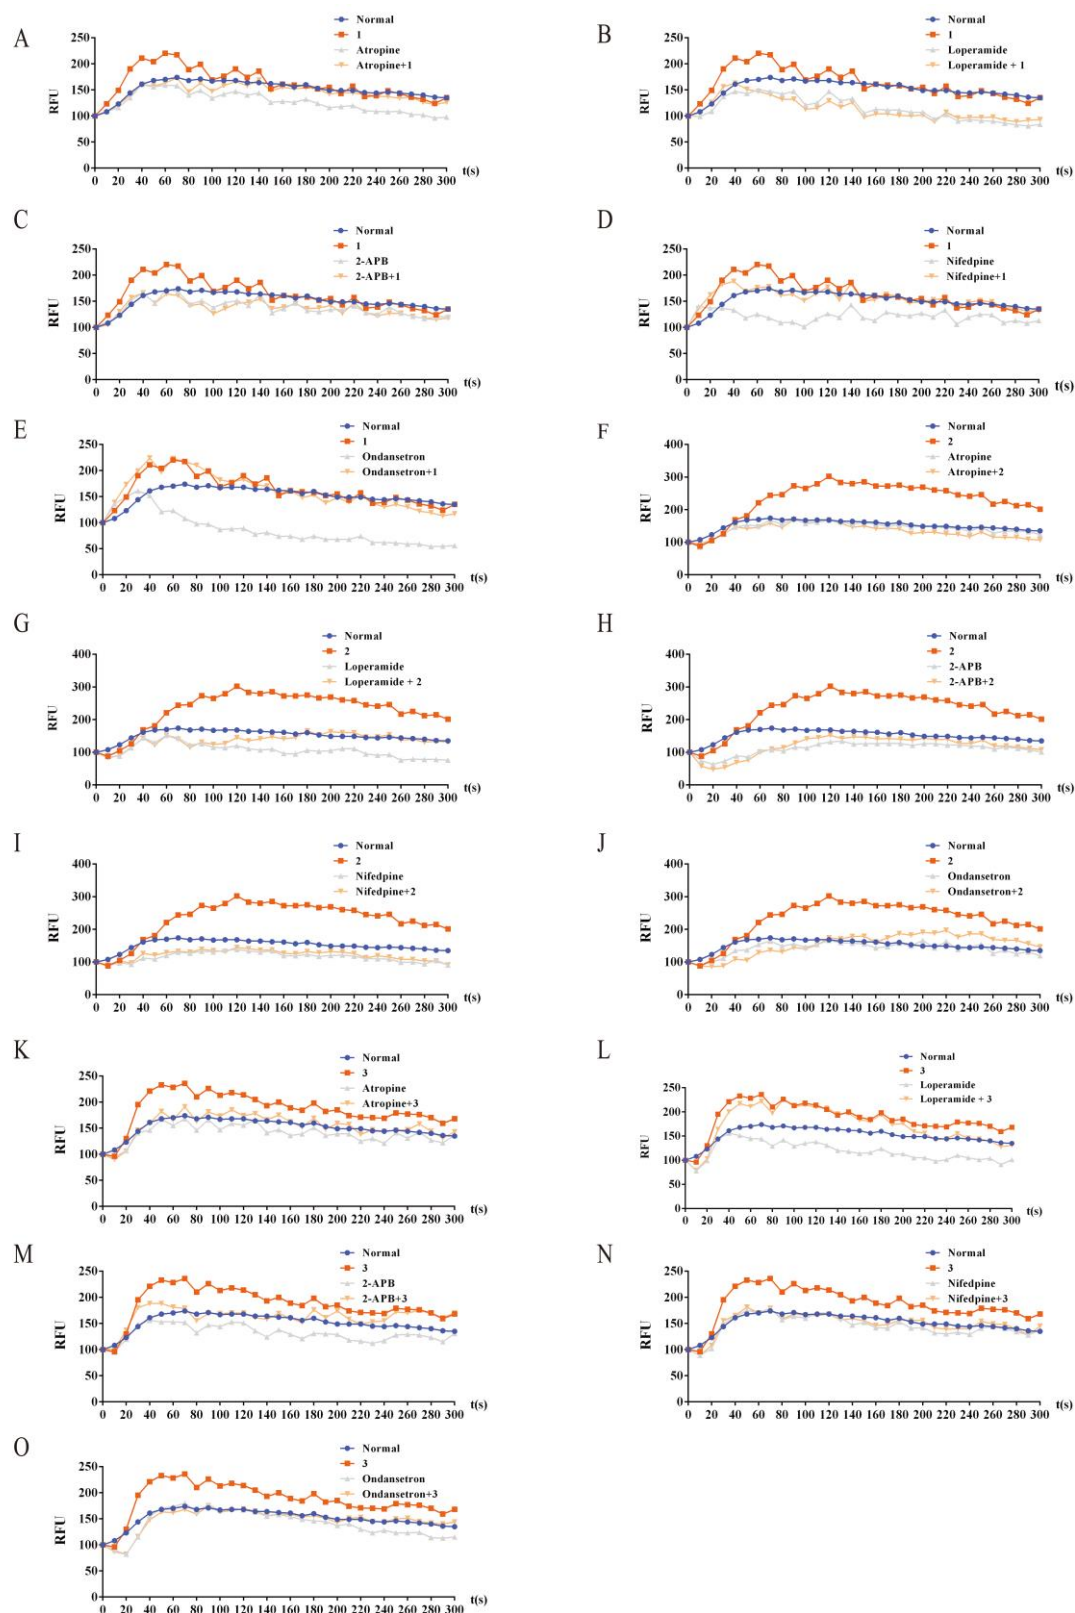

**Figure S2:** Calcium influx under AM flavonoids-treated with inhibitors. (A-O) Effects of 1 (A-E), 2 (F-J) and 3 (K-O) on isolated calcium influx of HCT116 with different inhibitors.

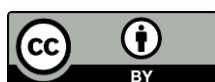

Supplement: s1 [file s1]
